# Supplementary material for: A deep learning integrated radiomics model for identification of coronavirus disease 2019 using computed tomography
Source: PubMed Central journal article supplement (PMC7886892; doi:10.1038/s41598-021-83237-6), 2021-02-16
Supplement: 41598_2021_83237_MOESM2_ESM.pdf [file 41598_2021_83237_MOESM2_ESM.pdf]

## **Appendix Tables**

**Title:** A Deep Learning Integrated Radiomics Model for Identification of Coronavirus Disease 2019 Using Computed Tomography

**Authors:** Xiaoguo Zhang<sup>1§</sup>, Dawei Wang<sup>2§</sup>, Jiang Shao<sup>3</sup>, Song Tian<sup>2</sup>, Weixiong Tan<sup>2</sup>, Yan Ma<sup>1</sup>, Qingnan Xu<sup>1</sup>, Xiaoman Ma<sup>1</sup>, Dasheng Li<sup>4</sup>, Jun Chai<sup>5</sup>, Dingjun Wang<sup>6</sup>, Wenwen Liu<sup>3</sup>, Lingbo Lin<sup>3</sup>, Jiangfen Wu<sup>2</sup>, Chen Xia<sup>2</sup>, Zhongfa Zhang<sup>1\*</sup>

**Manuscript tracking number:** SREP-20-02072A

**Appended Table 1. Clinical stages of included COVID-19 patients**

| Type     | Hospitals                   | Mild       | Moderate   | Severe   | Critical |
|----------|-----------------------------|------------|------------|----------|----------|
| COVID-19 | Medical Center 1 (60 cases) | 18 (30.0%) | 41 (68.3%) | 1 (1.7%) | 0        |
|          | Medical Center 2 (38 cases) | 12 (31.6%) | 25 (65.8%) | 1 (2.6%) | 0        |
|          | Medical Center 3 (31 cases) | 5 (16.1%)  | 24 (77.4%) | 1 (3.2%) | 1 (3.2%) |

**Appended Table 2. Imaging manifestations of included COVID-19 patients**

| Type     | Hospitals                    | Multifocal small patchy shadows # | Ground glass opacity # | Consolidation # | Infiltrates # | Pleural effusion # | Interstitial changes # |
|----------|------------------------------|-----------------------------------|------------------------|-----------------|---------------|--------------------|------------------------|
| COVID-19 | Medical Center 1 (132 scans) | 48 (36.4%)                        | 95 (72.0%)             | 9 (6.8%)        | 1 (0.8%)      | 0                  | 0                      |
|          | Medical Center 2 (38 scans)  | 8 (21.1%)                         | 28 (73.7%)             | 0               | 0             | 0                  | 2 (5.3%)               |
|          | Medical Center 3 (33 scans)  | 10 (30.3%)                        | 26 (78.8%)             | 1 (3.0%)        | 0             | 0                  | 3 (9.1%)               |
| CAP      | Medical Center 1 (96 scans)  | 35 (36.5%)                        | 16 (16.7%)             | 2 (2.1%)        | 0             | 0                  | 49 (51.0%)             |
|          | Medical Center 2 (105 scans) | 46 (43.8%)                        | 37 (35.2%)             | 24 (22.9%)      | 2 (1.9%)      | 1 (1.0%)           | 1 (1.0%)               |
|          | Medical Center 3 (62 scans)  | 32 (51.6%)                        | 38 (61.3%)             | 23 (37.1%)      | 0             | 9 (14.5%)          | 3 (4.8%)               |

**Appendix Table 3. The number of radiomics features extracted with Pyradiomics2.2.0 on CT images.**

| Filters                      | Category |      |       |       |       |      |                    | Total |
|------------------------------|----------|------|-------|-------|-------|------|--------------------|-------|
|                              | FOS      | GLCM | GLRLM | GLSZM | NGTDM | GLDM | Shape <sup>#</sup> |       |
| <b>Original image</b>        | 18       | 21   | 16    | 16    | 5     | 14   | 14                 | 104   |
| <b>Wavelet*</b>              | 144      | 168  | 128   | 128   | 40    | 112  | 0                  | 720   |
| <b>Square</b>                | 18       | 21   | 16    | 16    | 5     | 14   | 0                  | 90    |
| <b>Square Root</b>           | 18       | 21   | 16    | 16    | 5     | 14   | 0                  | 90    |
| <b>Logarithm</b>             | 18       | 21   | 16    | 16    | 5     | 14   | 0                  | 90    |
| <b>Exponential</b>           | 18       | 21   | 16    | 16    | 5     | 14   | 0                  | 90    |
| <b>LocalBinaryPattern3D*</b> | 54       | 63   | 48    | 48    | 15    | 42   | 0                  | 270   |
| <b>Total</b>                 | 288      | 336  | 256   | 256   | 80    | 224  | 14                 | 1454  |

Note: #Category “Shape” features were only extracted from the original image, were not included in the group analysis because of the obvious difference between the study group and the control group;

\*Filter “Wavelet” uses 8 levels of LLL, LLH, LHL, LHH, HLL, HHL, HLH, and HHH to process images;

\*Filter “LocalBinaryPattern3D” uses 3 levels of m1, m2, and k to process images.

**Appendix Table 4. Selected features with PCC<0.8**

| <b>Number</b> | <b>Features</b>                                           |
|---------------|-----------------------------------------------------------|
| 1             | shape_LeastAxisLength_original                            |
| 2             | shape_MajorAxisLength_original                            |
| 3             | shape_Maximum2DDiameterColumn_original                    |
| 4             | shape_Maximum2DDiameterSlice_original                     |
| 5             | shape_Sphericity_original                                 |
| 6             | firstorder_10Percentile_original                          |
| 7             | firstorder_Minimum_original                               |
| 8             | glcm_Autocorrelation_original                             |
| 9             | glcm_Imc2_original                                        |
| 10            | gldm_LargeDependenceHighGrayLevelEmphasis_original        |
| 11            | gldm_LowGrayLevelEmphasis_original                        |
| 12            | gldm_SmallDependenceHighGrayLevelEmphasis_original        |
| 13            | glszm_SizeZoneNonUniformityNormalized_original            |
| 14            | firstorder_Range_log-sigma-1-0-mm-3D                      |
| 15            | glcm_Correlation_log-sigma-1-0-mm-3D                      |
| 16            | glcm_Imc2_log-sigma-1-0-mm-3D                             |
| 17            | glrlm_LongRunEmphasis_log-sigma-1-0-mm-3D                 |
| 18            | firstorder_10Percentile_log-sigma-2-0-mm-3D               |
| 19            | firstorder_InterquartileRange_log-sigma-2-0-mm-3D         |
| 20            | firstorder_Median_log-sigma-2-0-mm-3D                     |
| 21            | firstorder_Skewness_log-sigma-2-0-mm-3D                   |
| 22            | glcm_ClusterShade_log-sigma-2-0-mm-3D                     |
| 23            | glcm_DifferenceVariance_log-sigma-2-0-mm-3D               |
| 24            | glcm_Imc2_log-sigma-2-0-mm-3D                             |
| 25            | glrlm_RunEntropy_log-sigma-2-0-mm-3D                      |
| 26            | glszm_SizeZoneNonUniformityNormalized_log-sigma-2-0-mm-3D |
| 27            | firstorder_Skewness_log-sigma-3-0-mm-3D                   |
| 28            | glcm_Autocorrelation_log-sigma-3-0-mm-3D                  |
| 29            | glcm_ClusterProminence_log-sigma-3-0-mm-3D                |
| 30            | glcm_Imc1_log-sigma-3-0-mm-3D                             |
| 31            | glszm_GrayLevelVariance_log-sigma-3-0-mm-3D               |
| 32            | glszm_LargeAreaEmphasis_log-sigma-3-0-mm-3D               |
| 33            | glszm_SmallAreaEmphasis_log-sigma-3-0-mm-3D               |
| 34            | ngtdm_Strength_log-sigma-3-0-mm-3D                        |
| 35            | firstorder_Range_wavelet-LLH                              |
| 36            | firstorder_Skewness_wavelet-LLH                           |
| 37            | glcm_ClusterShade_wavelet-LLH                             |
| 38            | glcm_Correlation_wavelet-LLH                              |
| 39            | glcm_DifferenceVariance_wavelet-LLH                       |
| 40            | glcm_Idn_wavelet-LLH                                      |
| 41            | gldm_LargeDependenceHighGrayLevelEmphasis_wavelet-LLH     |

42 firstorder\_Maximum\_wavelet-LHL  
43 firstorder\_Median\_wavelet-LHL  
44 glcm\_ClusterShade\_wavelet-LHL  
45 glcm\_Imc2\_wavelet-LHL  
46 firstorder\_10Percentile\_wavelet-HLL  
47 firstorder\_Maximum\_wavelet-HLL  
48 glcm\_Correlation\_wavelet-HLL  
49 glcm\_MaximumProbability\_wavelet-HLL  
50 gldm\_LargeDependenceHighGrayLevelEmphasis\_wavelet-HLL  
51 glszm\_GrayLevelVariance\_wavelet-HLL  
52 firstorder\_Median\_wavelet-HLH  
53 glcm\_Correlation\_wavelet-HLH  
54 glcm\_Idm\_wavelet-HLH  
55 firstorder\_Maximum\_wavelet-HHL  
56 glszm\_SmallAreaLowGrayLevelEmphasis\_wavelet-HHL  
57 firstorder\_Skewness\_wavelet-HHH  
58 gldm\_DependenceVariance\_wavelet-HHH  
59 glszm\_SizeZoneNonUniformityNormalized\_wavelet-HHH  
60 glszm\_ZoneEntropy\_wavelet-HHH  
61 ngtdm\_Contrast\_wavelet-HHH  
62 firstorder\_Minimum\_wavelet-LLL  
63 gldm\_LargeDependenceLowGrayLevelEmphasis\_wavelet-LLL  
64 firstorder\_10Percentile\_square  
65 firstorder\_TotalEnergy\_square  
66 glcm\_InverseVariance\_square  
67 firstorder\_Kurtosis\_squareroot  
68 ngtdm\_Contrast\_squareroot  
69 glcm\_Correlation\_logarithm  
70 glcm\_Idmn\_logarithm  
71 glcm\_InverseVariance\_logarithm  
72 gldm\_DependenceVariance\_logarithm  
73 glrlm\_LowGrayLevelRunEmphasis\_logarithm  
74 glcm\_Correlation\_exponential  
75 glcm\_Imc1\_exponential  
76 gldm\_DependenceNonUniformityNormalized\_exponential  
77 gldm\_DependenceVariance\_exponential  
78 glszm\_GrayLevelNonUniformity\_exponential  
79 glszm\_SizeZoneNonUniformityNormalized\_exponential  
80 glszm\_SmallAreaEmphasis\_exponential  
81 ngtdm\_Strength\_exponential

---

PCC: Pearson Correlation Coefficient

**Appendix Table 5. Selected features with PCC<0.5**

| <b>Number</b> | <b>Features</b>                                       |
|---------------|-------------------------------------------------------|
| 1             | shape_MajorAxisLength_original                        |
| 2             | shape_Sphericity_original                             |
| 3             | firstorder_10Percentile_original                      |
| 4             | firstorder_Minimum_original                           |
| 5             | glcm_Imc2_original                                    |
| 6             | glcm_Correlation_log-sigma-1-0-mm-3D                  |
| 7             | gldm_LongRunEmphasis_log-sigma-1-0-mm-3D              |
| 8             | firstorder_Skewness_log-sigma-2-0-mm-3D               |
| 9             | glcm_Imc2_log-sigma-2-0-mm-3D                         |
| 10            | glszm_LargeAreaEmphasis_log-sigma-3-0-mm-3D           |
| 11            | firstorder_Skewness_wavelet-LLH                       |
| 12            | glcm_ClusterShade_wavelet-LLH                         |
| 13            | glcm_Correlation_wavelet-LLH                          |
| 14            | glcm_DifferenceVariance_wavelet-LLH                   |
| 15            | firstorder_Maximum_wavelet-LHL                        |
| 16            | glcm_ClusterShade_wavelet-LHL                         |
| 17            | firstorder_Maximum_wavelet-HLL                        |
| 18            | glcm_Correlation_wavelet-HLL                          |
| 19            | glcm_MaximumProbability_wavelet-HLL                   |
| 20            | gldm_LargeDependenceHighGrayLevelEmphasis_wavelet-HLL |
| 21            | glcm_Correlation_wavelet-HLH                          |
| 22            | firstorder_Skewness_wavelet-HHH                       |
| 23            | glszm_ZoneEntropy_wavelet-HHH                         |
| 24            | gldm_LargeDependenceLowGrayLevelEmphasis_wavelet-LLL  |
| 25            | glcm_Correlation_exponential                          |
| 26            | gldm_DependenceVariance_exponential                   |
| 27            | glszm_SmallAreaEmphasis_exponential                   |
| 28            | ngtdm_Strength_exponential                            |

PCC: Pearson Correlation Coefficient

**Appendix Table 6. Full list of 108 selected features and its coefficient**

| <b>Number</b> | <b>Features</b>                                           | <b>Coefficient</b> |
|---------------|-----------------------------------------------------------|--------------------|
| 1             | shape_LeastAxisLength_original                            | 1.880505066        |
| 2             | shape_MajorAxisLength_original                            | 2.294957641        |
| 3             | shape_Maximum2DDiameterColumn_original                    | 0.425688583        |
| 4             | shape_Maximum2DDiameterSlice_original                     | 1.627152883        |
| 5             | shape_Sphericity_original                                 | 0.811862796        |
| 6             | firstorder_10Percentile_original                          | 0.793800597        |
| 7             | firstorder_Minimum_original                               | 0.184805094        |
| 8             | glcm_Autocorrelation_original                             | -2.413475141       |
| 9             | glcm_Imc2_original                                        | 1.03867076         |
| 10            | gldm_LargeDependenceHighGrayLevelEmphasis_original        | -3.031591956       |
| 11            | gldm_LowGrayLevelEmphasis_original                        | -1.796036343       |
| 12            | gldm_SmallDependenceHighGrayLevelEmphasis_original        | -4.410486915       |
| 13            | glrlm_LongRunHighGrayLevelEmphasis_original               | -0.347583464       |
| 14            | glszm_SizeZoneNonUniformityNormalized_original            | -0.871195603       |
| 15            | glszm_SmallAreaEmphasis_original                          | -0.127036391       |
| 16            | firstorder_Range_log-sigma-1-0-mm-3D                      | -2.117761232       |
| 17            | glcm_Correlation_log-sigma-1-0-mm-3D                      | 2.26740875         |
| 18            | glcm_Imc2_log-sigma-1-0-mm-3D                             | 5.042339604        |
| 19            | glrlm_LongRunEmphasis_log-sigma-1-0-mm-3D                 | 1.266361312        |
| 20            | firstorder_10Percentile_log-sigma-2-0-mm-3D               | -0.626663897       |
| 21            | firstorder_InterquartileRange_log-sigma-2-0-mm-3D         | -1.140785943       |
| 22            | firstorder_Median_log-sigma-2-0-mm-3D                     | -2.483727561       |
| 23            | firstorder_Skewness_log-sigma-2-0-mm-3D                   | 3.177975258        |
| 24            | glcm_ClusterShade_log-sigma-2-0-mm-3D                     | 0.237778839        |
| 25            | glcm_DifferenceVariance_log-sigma-2-0-mm-3D               | 1.27653444         |
| 26            | glcm_Imc2_log-sigma-2-0-mm-3D                             | -1.875571042       |
| 27            | gldm_DependenceVariance_log-sigma-2-0-mm-3D               | 0.221343177        |
| 28            | glrlm_RunEntropy_log-sigma-2-0-mm-3D                      | 2.589981146        |
| 29            | glrlm_RunVariance_log-sigma-2-0-mm-3D                     | 2.478212614        |
| 30            | glszm_SizeZoneNonUniformityNormalized_log-sigma-2-0-mm-3D | 1.888927292        |
| 31            | firstorder_10Percentile_log-sigma-3-0-mm-3D               | -0.885390748       |
| 32            | firstorder_Skewness_log-sigma-3-0-mm-3D                   | 3.297306764        |
| 33            | glcm_Autocorrelation_log-sigma-3-0-mm-3D                  | -1.165320669       |
| 34            | glcm_ClusterProminence_log-sigma-3-0-mm-3D                | -1.320963385       |
| 35            | glcm_DifferenceVariance_log-sigma-3-0-mm-3D               | 2.14962571         |
| 36            | glcm_Imc1_log-sigma-3-0-mm-3D                             | 0.16793972         |
| 37            | glrlm_RunEntropy_log-sigma-3-0-mm-3D                      | 1.21665584         |
| 38            | glszm_GrayLevelVariance_log-sigma-3-0-mm-3D               | 0.169704864        |
| 39            | glszm_LargeAreaEmphasis_log-sigma-3-0-mm-3D               | 1.086798968        |
| 40            | glszm_LargeAreaLowGrayLevelEmphasis_log-sigma-3-0-mm-3D   | 1.047031209        |
| 41            | glszm_SmallAreaEmphasis_log-sigma-3-0-mm-3D               | 0.525500887        |

|    |                                                       |              |
|----|-------------------------------------------------------|--------------|
| 42 | glszm_ZoneVariance_log-sigma-3-0-mm-3D                | 2.687815373  |
| 43 | ngtdm_Busyness_log-sigma-3-0-mm-3D                    | 2.416717522  |
| 44 | ngtdm_Strength_log-sigma-3-0-mm-3D                    | 1.457640141  |
| 45 | firstorder_Range_wavelet-LLH                          | -1.361441577 |
| 46 | firstorder_Skewness_wavelet-LLH                       | 0.149274045  |
| 47 | glcm_ClusterShade_wavelet-LLH                         | 1.086698727  |
| 48 | glcm_Correlation_wavelet-LLH                          | -0.712348875 |
| 49 | glcm_DifferenceVariance_wavelet-LLH                   | 0.381594775  |
| 50 | glcm_Idn_wavelet-LLH                                  | -0.135303041 |
| 51 | gldm_LargeDependenceHighGrayLevelEmphasis_wavelet-LLH | -1.778343411 |
| 52 | glszm_SizeZoneNonUniformityNormalized_wavelet-LLH     | -2.033921119 |
| 53 | firstorder_Maximum_wavelet-LHL                        | -0.073670032 |
| 54 | firstorder_Median_wavelet-LHL                         | 0.913598927  |
| 55 | glcm_ClusterShade_wavelet-LHL                         | -0.964534434 |
| 56 | glcm_Imc2_wavelet-LHL                                 | -1.080561542 |
| 57 | ngtdm_Busyness_wavelet-LHL                            | -0.32845217  |
| 58 | firstorder_10Percentile_wavelet-HLL                   | -1.31190271  |
| 59 | firstorder_Maximum_wavelet-HLL                        | -0.158519493 |
| 60 | glcm_Correlation_wavelet-HLL                          | -2.359568048 |
| 61 | glcm_Imc2_wavelet-HLL                                 | -4.491543677 |
| 62 | glcm_MaximumProbability_wavelet-HLL                   | 0.050356873  |
| 63 | gldm_LargeDependenceHighGrayLevelEmphasis_wavelet-HLL | 0.424853177  |
| 64 | glszm_GrayLevelVariance_wavelet-HLL                   | 3.440753477  |
| 65 | firstorder_Median_wavelet-HLH                         | -0.704105121 |
| 66 | glcm_Correlation_wavelet-HLH                          | -0.006522434 |
| 67 | glcm_Imc2_wavelet-HLH                                 | 0.022906707  |
| 68 | glcm_Idm_wavelet-HLH                                  | -0.706327233 |
| 69 | glcm_InverseVariance_wavelet-HLH                      | -1.133511664 |
| 70 | firstorder_Maximum_wavelet-HHL                        | 3.296839961  |
| 71 | gldm_DependenceVariance_wavelet-HHL                   | 0.26944139   |
| 72 | glrlm_RunLengthNonUniformity_wavelet-HHL              | 0.799816899  |
| 73 | glszm_SmallAreaLowGrayLevelEmphasis_wavelet-HHL       | 1.974890702  |
| 74 | firstorder_Skewness_wavelet-HHH                       | -0.340716895 |
| 75 | gldm_DependenceVariance_wavelet-HHH                   | -1.006619688 |
| 76 | glszm_SizeZoneNonUniformityNormalized_wavelet-HHH     | 0.486293033  |
| 77 | glszm_ZoneEntropy_wavelet-HHH                         | -0.06150977  |
| 78 | ngtdm_Contrast_wavelet-HHH                            | -0.480069748 |
| 79 | firstorder_Minimum_wavelet-LLL                        | 0.033769647  |
| 80 | gldm_LargeDependenceLowGrayLevelEmphasis_wavelet-LLL  | -0.205225284 |
| 81 | glszm_SizeZoneNonUniformityNormalized_wavelet-LLL     | -1.10151859  |
| 82 | firstorder_10Percentile_square                        | -0.782584428 |
| 83 | firstorder_TotalEnergy_square                         | -2.299864375 |
| 84 | glcm_InverseVariance_square                           | 0.788783461  |
| 85 | firstorder_Kurtosis_squareroot                        | -1.083923784 |

|     |                                                    |              |
|-----|----------------------------------------------------|--------------|
| 86  | firstorder_Skewness_squareroot                     | -0.548422833 |
| 87  | ngtdm_Contrast_squareroot                          | -0.079778824 |
| 88  | firstorder_Kurtosis_logarithm                      | -0.757394057 |
| 89  | glcm_Correlation_logarithm                         | -1.064693375 |
| 90  | glcm_Idmn_logarithm                                | 0.525876702  |
| 91  | glcm_InverseVariance_logarithm                     | 1.278209203  |
| 92  | gldm_DependenceVariance_logarithm                  | -0.604391038 |
| 93  | glrlm_LowGrayLevelRunEmphasis_logarithm            | -3.781826392 |
| 94  | glcm_Correlation_exponential                       | -0.794084783 |
| 95  | glcm_Imc1_exponential                              | -0.167110841 |
| 96  | gldm_DependenceNonUniformityNormalized_exponential | 0.038363741  |
| 97  | gldm_DependenceVariance_exponential                | -2.254036224 |
| 98  | glrlm_LongRunEmphasis_exponential                  | -3.474263908 |
| 99  | glrlm_LongRunHighGrayLevelEmphasis_exponential     | -3.274788077 |
| 100 | glrlm_LongRunLowGrayLevelEmphasis_exponential      | -3.156878333 |
| 101 | glrlm_ShortRunEmphasis_exponential                 | -0.899122026 |
| 102 | glrlm_ShortRunLowGrayLevelEmphasis_exponential     | -1.019911454 |
| 103 | glszm_GrayLevelNonUniformity_exponential           | -2.741863539 |
| 104 | glszm_SizeZoneNonUniformityNormalized_exponential  | 2.67762321   |
| 105 | glszm_SmallAreaEmphasis_exponential                | -0.32787846  |
| 106 | glszm_SmallAreaLowGrayLevelEmphasis_exponential    | -0.676263749 |
| 107 | glszm_ZoneVariance_exponential                     | 2.638052411  |
| 108 | ngtdm_Strength_exponential                         | -1.218921942 |

---
